# Supplementary material for: Rational synthesis of zerovalent iron/bamboo charcoal composites with high saturation magnetization
Source: Royal Society of Chemistry journal article supplement (doi:10.1039/c5ra13236c), 2015-01-01
Supplement: c5ra13236c1.pdf [file c5ra13236c1.pdf]

Supplemental Materials

## **Rational synthesis of zerovalent iron/bamboo charcoal composites with high saturation magnetization**

Mingshan Wu,<sup>ab</sup> Jianfeng Ma,<sup>a</sup> Zhiyong Cai,<sup>c</sup> Genlin Tian,<sup>a</sup> Shumin Yang,<sup>a</sup> Youhong Wang<sup>b</sup> and  
Xing'e Liu<sup>\*a</sup>

<sup>a</sup>*International Centre for Bamboo and Rattan, Beijing, 100102, China. E-mail address:  
liuxe@icbr.ac.cn; Tel: +86 1084789712.*

<sup>b</sup>*School of Forestry and Landscape Architecture, Anhui Agricultural University, Hefei, 230036,  
China.*

<sup>c</sup>*Forest Products Laboratory, Forest Service, Madison, WI 53726-2398, USA.*

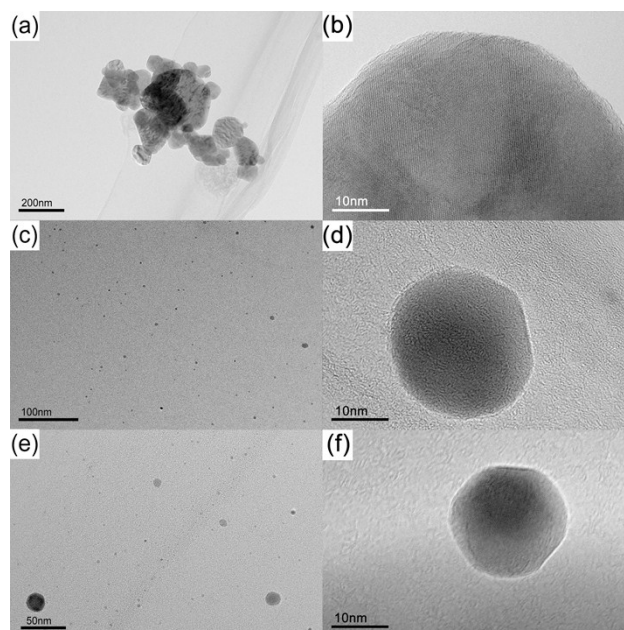

**Fig. S1.** HRTEM images of respective sample: (a-b) MBC800, (c-d) MBC1000 and (e-f) MBC1200.

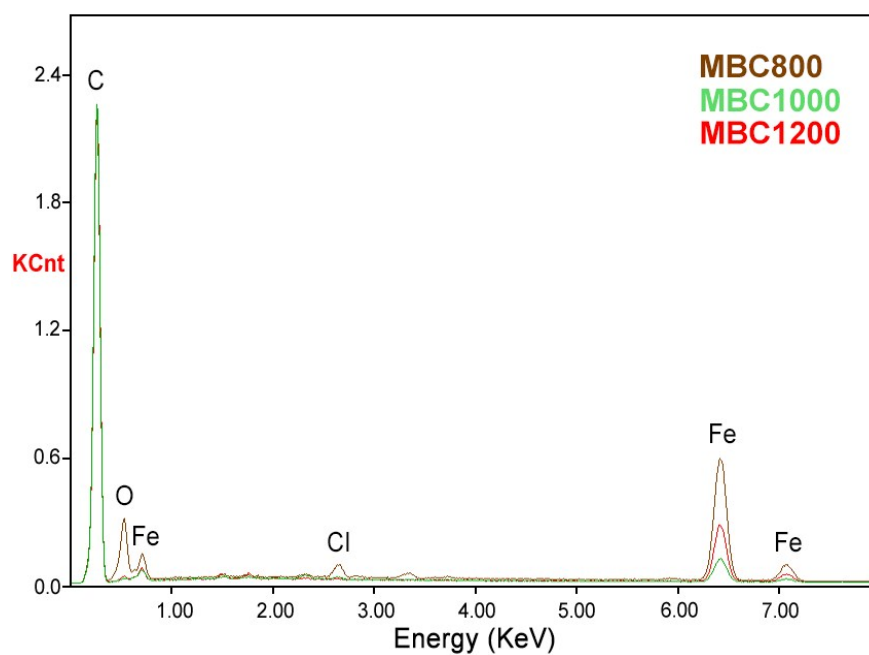

**Fig. S2.** EDAX spectra of MBC800, MBC1000 and MBC1200.
